# Supplementary material for: Antimicrobial Activities of α-Helix and β-Sheet Peptides against the Major Bovine Respiratory Disease Agent, Mannheimia haemolytica
Source: MDPI journal article supplement (doi:10.3390/ijms25084164), 2024-04-09
Supplement: s1 [file s1]

Peptide MIC Plate map

|                   |   | 1   | 2   | 3  | 4  | 5  | 6 | 7 | 8 | 9 | 10  | 11   | 12 |
|-------------------|---|-----|-----|----|----|----|---|---|---|---|-----|------|----|
| Peptide (µg/mL)   |   | 256 | 128 | 64 | 32 | 16 | 8 | 4 | 2 | 1 | 0.5 | 0.25 | 0  |
| Mh 535            | A |     |     |    |    |    |   |   |   |   |     |      |    |
| Mh 535            | B |     |     |    |    |    |   |   |   |   |     |      |    |
| Mh 587            | C |     |     |    |    |    |   |   |   |   |     |      |    |
| Mh 587            | D |     |     |    |    |    |   |   |   |   |     |      |    |
| Mh 13             | E |     |     |    |    |    |   |   |   |   |     |      |    |
| Mh 13             | F |     |     |    |    |    |   |   |   |   |     |      |    |
| E. coli ATCC25922 | G |     |     |    |    |    |   |   |   |   |     |      |    |
| Media diluent     | H |     |     |    |    |    |   |   |   |   |     |      |    |

Figure S1: Plate layout for determining the minimum inhibitory concentration of antimicrobial peptides against *M. haemolytica*.
