# Supplementary material for: Antimicrobial Activities of α-Helix and β-Sheet Peptides against the Major Bovine Respiratory Disease Agent, Mannheimia haemolytica
Source: MDPI journal article supplement (doi:10.3390/ijms25084164), 2024-04-09
Supplement: s1 [file s1]

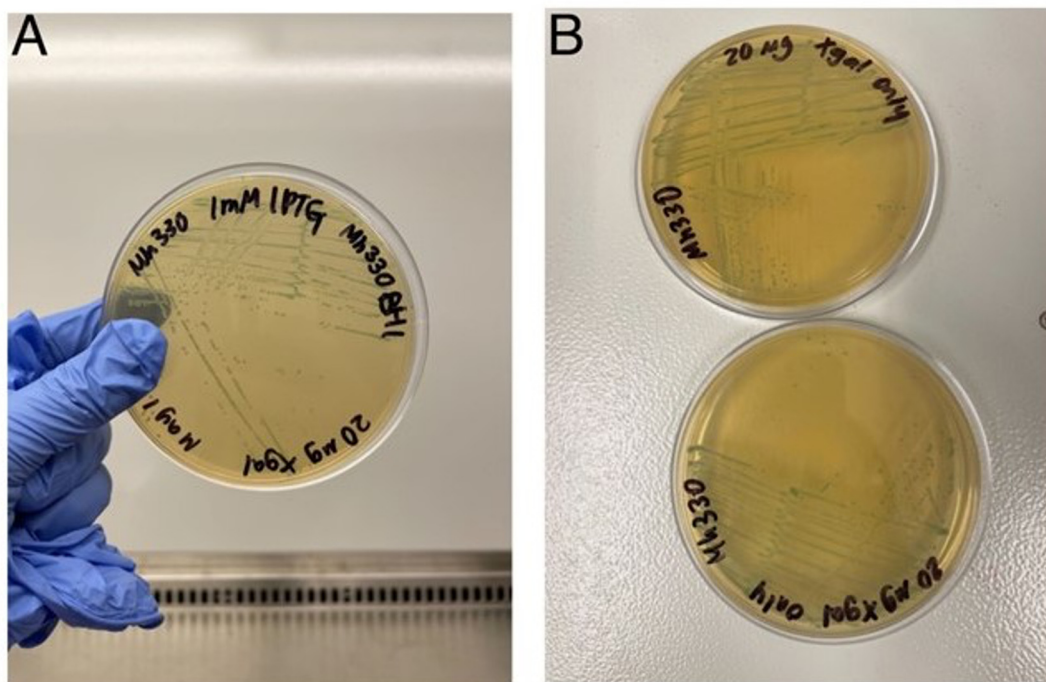

Figure S2. (A) *M. haemolytica* Mh 330 streaked on BHI agar with 1 mM IPTG and 20 µg of X-gal (B) Mh 330 streaked on BHI agar with X-gal only
